# Supplementary material for: The kinase Sgg modulates temporal development of macrochaetes inDrosophilaby phosphorylation of Scute and Pannier
Source: Oxford University Press journal article supplement (doi:10.1242/dev.074260), 2011-12-08
Supplement: dev074260tables1.pdf [file dev074260tables1.pdf]

**Table S1. Primers pairs used for site-directed mutagenesis**

|                               |                                                                                                                            |
|-------------------------------|----------------------------------------------------------------------------------------------------------------------------|
| S101A mutation in pnr $\beta$ | 5'-GGCTTCAAAGATCCGCGCCCTACGAGAGCG-3'<br>5'-CGCTCTCGTAGGGCGCGGATCTTTGGAAGCC-3'                                              |
| S391A mutation in pnr $\beta$ | 5'-TGAGCAACGGAACCTCCGCGCCCCATTACCA-3'<br>5'-TGGTAATGGGGCGCGGGAGTTCGGTTGCTCA-3'                                             |
| S268A/S272A mutant in Sc      | 5'-CCAGCAAACCTGCCACGCGCCAACATCAGCATTCAACTCCAGCAT-3'<br>5'-ATGCTGGAGTTGAATGCTGATGTTGGCGGTGGCAGGTTTGCTGG-3'                  |
| dTCF site 1 mutation in DCE   | 5'-TGAGATTGACTGTAATTGAAATTTTGTGTCAGATCGGAGCCAGACTTCAGAC-3'<br>5'-GTCTGAAGTCTGGCTCCGATCTGCAGCAAAAATTTCAATTACAGTCGAATCTCA-3' |
| dTCF site 2 mutation in DCE   | 5'-GTCCAATCTAATCGTTTGCCAAAGAACAAACGAGTTTCATTCATCCGGC-3'<br>5'-GCCGGATGAATGAAACTCGTTTGTCTTTGGCAAACGATTAGATTGGAC-3'          |
| dTCF site 3 mutation in DCE   | 5'-TGACAAACACGCGTGAATAGCGGAAAACGTTTTTAGAGCTTTATC-3'<br>5'-GATAAGAGCTCTAAAAACGTTTTCCGCTATTCACGCGTGTGTTGTC-3'                |
