# Supplementary figures and images for: The kinase Sgg modulates temporal development of macrochaetes inDrosophilaby phosphorylation of Scute and Pannier
Source: Oxford University Press journal article supplement (doi:10.1242/dev.074260), 2011-12-08

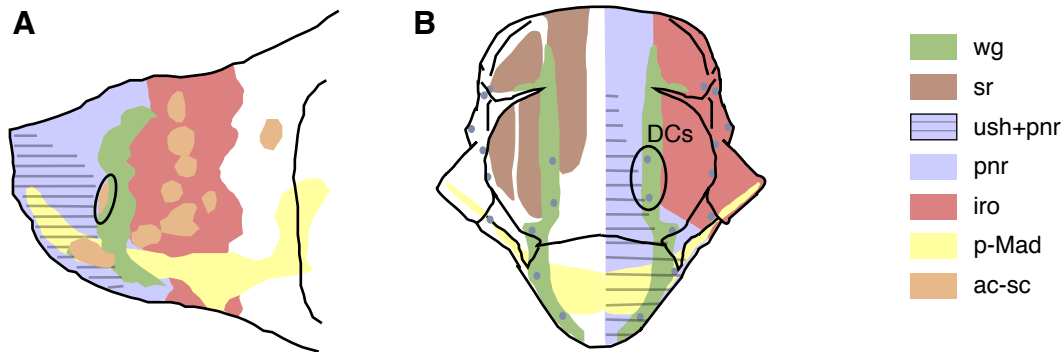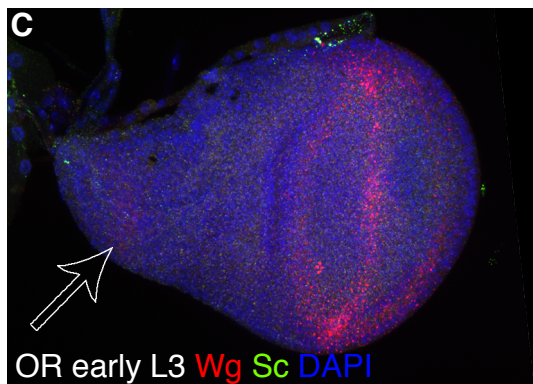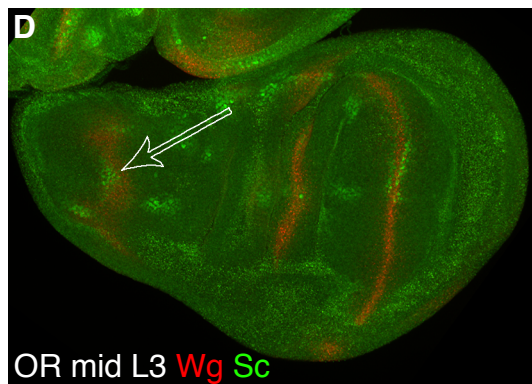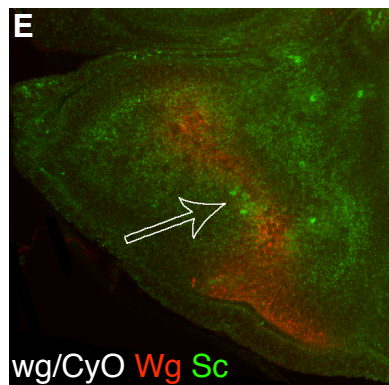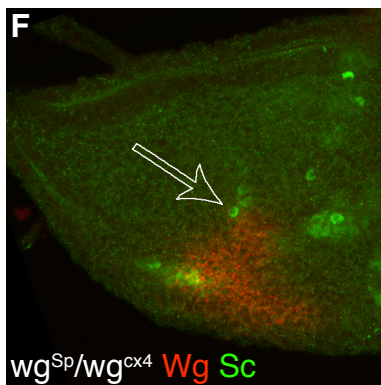

Supplement: dev074260figs1.pdf [file dev074260figs1.pdf]
